# Supplementary material
Source: publisher figshare collection journal article supplement (https://asha.figshare.com/articles/dataset/_/21217814)
Supplement: Supplementary file 1 [file 1]

**Supplemental Material S2.** Signs and gestures produced by participants (complementary and supplementary).

| Participant ID | Signs/gestures produced | Description      |
|----------------|-------------------------|------------------|
| 6              | FIVE                    | noun             |
| 7              | YES                     | interjection     |
|                | YES                     | interjection     |
| 8              | gesture: saw            | noun/verb*       |
|                | gesture: slow           | adjective        |
|                | point: nose             | noun             |
| 9              | FALL                    | noun             |
|                | fingerspelling: RIPPING | verb             |
|                | gesture: arrow          | noun             |
|                | gesture: diamond        | noun             |
|                | gesture: hitter/thrower | noun             |
|                | gesture: plate          | noun             |
|                | gesture: rectangle      | noun             |
|                | gesture: saw            | noun/verb        |
|                | GIRAFFE                 | noun             |
|                | HERE FOR TWO MONTHS     | adverbial phrase |
|                | MY SISTER JOIN          | sentence         |
|                | PENGUIN                 | noun             |
|                | point: elbow            | noun             |
|                | point: wrist            | noun             |
|                | SPRING                  | noun             |
|                | SUMMER                  | noun             |
|                | WINTER                  | noun             |
| 10             | BATHROOM                | noun             |
| 11             | CHAIR                   | noun             |
|                | EAT                     | verb             |
|                | EGG                     | noun             |
|                | gesture: circle         | noun             |
|                | gesture: kangaroo       | noun             |
|                | gesture: rectangle      | noun             |
|                | gesture: guitar         | noun             |
|                | OPEN                    | verb             |
|                | point: chin             | noun             |
| 12             | ROCK                    | noun             |
|                | WHITE                   | adjective        |
| 13             | gesture: bird           | noun             |
|                | gesture: drums          | noun/verb        |
| 13             | APPLE                   | noun             |
|                | BANANA                  | noun             |

|    |                  |           |
|----|------------------|-----------|
| 14 | CHAIR            | noun      |
|    | gesture: circle  | noun      |
|    | FATHER           | noun      |
|    | FIVE             | noun      |
| 15 | LEAF             | noun      |
|    | gesture: guitar  | noun      |
|    | gesture: horse   | noun      |
|    | gesture: sad     | adjective |
|    | gesture: skunk   | noun      |
|    | LEAF             | noun      |
| 16 | SWIM             | verb      |
|    | BROWN            | adjective |
|    | BROWN            | adjective |
|    | CHICKEN          | noun      |
|    | CHICKEN          | noun      |
|    | DEER             | noun      |
|    | DOG              | noun      |
|    | EAT              | verb      |
|    | FOUR             | noun      |
|    | FOX              | noun      |
|    | gesture: basket  | noun      |
|    | gesture: drawing | verb      |
|    | gesture: drums   | noun/verb |
|    | gesture: zipper  | noun      |
|    | GREEN            | adjective |
|    | LION             | noun      |
|    | MONKEY           | noun      |
|    | ORANGE           | adjective |
|    | PIG              | noun      |
|    | point: ear       | noun      |
|    | point: elbow     | noun      |
|    | point: hair      | noun      |
|    | point: neck      | noun      |
|    | point: nose      | noun      |
|    | point: nose      | noun      |
|    | PURPLE           | adjective |
|    | RED              | adjective |
|    | THREE            | noun      |
|    | TREE             | noun      |
|    | TWO              | noun      |
| 17 | BOOK             | noun      |
|    | BROWN            | adjective |
|    | CUT              | verb      |
|    | EAT              | verb      |

|    |                     |             |
|----|---------------------|-------------|
| 18 | FLOWER              | noun        |
|    | gesture: glasses    | noun        |
|    | point: ear          | noun        |
|    | point: nose         | noun        |
|    | TWO                 | noun        |
|    | BIG                 | adjective   |
|    | BIKE                | noun        |
|    | BIKE                | noun        |
|    | DON'T-KNOW          | verb        |
|    | DRIVE HOME          | verb phrase |
|    | ELEPHANT            | noun        |
|    | HOME                | noun        |
|    | ONE                 | noun        |
|    | ONE                 | noun        |
|    | ONE                 | noun        |
|    | point: camera       | noun        |
|    | point: ear          | noun        |
|    | point: nose         | noun        |
| 19 | AIRPLANE            | noun        |
|    | APPLE               | noun        |
|    | BANANA              | noun        |
|    | BIRD                | noun        |
|    | BOOK                | noun        |
|    | BROTHER             | noun        |
|    | CAMERA              | noun        |
|    | CHAIR               | noun        |
|    | DEER                | noun        |
|    | DUCK                | noun        |
|    | EAT                 | verb        |
|    | ELEPHANT            | noun        |
|    | FLOWER              | noun        |
|    | gesture: dig        | verb        |
|    | gesture: dig        | verb        |
|    | gesture: drums      | noun/verb   |
|    | gesture: helicopter | noun        |
|    | gesture: here       | adverb      |
|    | gesture: key        | noun        |
|    | gesture: neck       | noun        |
|    | gesture: necklace   | noun        |
|    | gesture: square     | noun        |
|    | gesture: zipper     | noun        |
|    | HORSE               | noun        |
|    | MONKEY              | noun        |
|    | PENGUIN             | noun        |

---

|               |           |
|---------------|-----------|
| PINK          | adjective |
| point: button | noun      |
| point: ear    | noun      |
| point: elbow  | noun      |
| point: hair   | noun      |
| point: knee   | noun      |
| point: nose   | noun      |
| point: shirt  | noun      |
| RAINBOW       | noun      |
| SHOE          | noun      |
| SQUIRREL      | noun      |
| TURTLE        | noun      |

---

*\*Note.* It may be difficult to tell the difference between a noun and a verb for some signs and gestures. An example of this is when the child makes a gesture that looks like an action, e.g., a sawing motion could represent a saw (a noun) or the act of sawing (a verb).
