# Supplementary material
Source: publisher figshare collection journal article supplement (https://asha.figshare.com/articles/dataset/_/21217814)
Supplement: Supplementary file 2 [file 1]

**Supplemental Material S1.** Speech, language, and sign data by participant.

| Subject | Age  | Sex | PPVT | CELF-RLI | MSEL RL T | EVT | GFTA | WPM  | #<br>Spoken<br>Utts | NDW | %<br>Intell.<br>Utts | NTS | #<br>Comp.<br>Signs | #<br>Supp.<br>Signs |
|---------|------|-----|------|----------|-----------|-----|------|------|---------------------|-----|----------------------|-----|---------------------|---------------------|
| 1       | 3.8  | M   | 69   |          |           | 48  |      | 0.0  | 0                   | 0   | 0.0                  | 0   | 0                   | 0                   |
| 2       | 4.9  | M   | 76   |          | 31        | 51  | 40   | 11.7 | 206                 | 28  | 82.7                 | 0   | 0                   | 0                   |
| 3       | 7.1  | F   | 103  | 89       |           | 95  | 76   | 54.5 | 260                 | 280 | 95.7                 | 0   | 0                   | 0                   |
| 4       | 10.1 | M   | 77   | 75       |           | 78  | 75   | 64.4 | 226                 | 282 | 94.7                 | 0   | 0                   | 0                   |
| 5       | 11.1 | F   | 75   | 78       |           | 83  | 85   | 28.8 | 146                 | 190 | 97.3                 | 0   | 0                   | 0                   |
| 6       | 6.7  | M   | 88   | 74       |           | 87  | 62   | 53.0 | 201                 | 179 | 89.0                 | 1   | 1                   | 0                   |
| 7       | 7.1  | M   | 65   | 63       |           | 72  | 40   | 4.9  | 45                  | 19  | 91.1                 | 2   | 2                   | 0                   |
| 8       | 3.8  | M   | 107  |          | 40        | 98  | 64   | 11.0 | 73                  | 66  | 86.3                 | 3   | 3                   | 0                   |
| 9       | 7.8  | F   | 96   | 104      |           | 97  | 55   | 37.2 | 141                 | 160 | 97.2                 | 22  | 22                  | 0                   |
| 10      | 4.3  | M   | 88   |          | 38        | 75  | 41   | 0.0  | 0                   | 0   | 0.0                  | 1   | 0                   | 1                   |
| 11      | 7.8  | F   | 66   | 55       |           | 76  | 40   | 11.3 | 69                  | 59  | 76.5                 | 11  | 10                  | 1                   |
| 12      | 5.7  | M   | 66   |          | 20        | 75  | 40   | 19.5 | 203                 | 112 | 65.6                 | 2   | 0                   | 2                   |
| 13      | 6.7  | F   | 40   |          |           | 40  |      | 0.7  | 10                  | 2   | 90.0                 | 3   | 0                   | 3                   |
| 14      | 5.6  | M   | 66   |          | 20        | 75  | 43   | 18.6 | 156                 | 72  | 92.1                 | 4   | 1                   | 3                   |
| 15      | 5.8  | M   | 89   | 78       |           | 84  | 77   | 48.7 | 172                 | 210 | 95.3                 | 6   | 3                   | 3                   |
| 16      | 4.8  | M   | 76   |          | 25        | 75  | 56   | 17.7 | 136                 | 99  | 81.6                 | 29  | 25                  | 4                   |
| 17      | 4.7  | F   | 89   |          | 37        | 58  |      | 96.0 | 125                 | 23  | 57.6                 | 9   | 2                   | 7                   |
| 18      | 4.3  | M   | 90   |          | 39        | 61  |      | 10.6 | 79                  | 51  | 67.1                 | 14  | 6                   | 8                   |
| 19      | 9.6  | M   | 67   | 55       |           | 67  | 40   | 7.0  | 68                  | 46  | 92.6                 | 38  | 34                  | 4                   |

*Note.* PPVT = standard score from Peabody Picture Vocabulary Test–Fourth Edition; CELF-RLI = standard score from Clinical Evaluation of Language Fundamentals–Fifth Edition, Receptive Language Index; EVT = standard score from Expressive Vocabulary Test–Third Edition; GFTA = standard score from Goldman-Fristoe Test of Articulation–Second Edition; WPM = words per minute from language sample; # Spoken Utts = number of spoken utterances from language sample; NDW = number of different spoken words from language sample; % Intell. Utts = percent of intelligible spoken utterances from language sample; NTS = number of total signs from language sample and EVT-3; # Comp. Signs = number of complementary signs from language sample and EVT-3; # Supp. Signs = number of supplementary signs from language sample and EVT-3.
